# Supplementary material for: Restoration cannot be scaled up globally to save reefs from loss and degradation
Source: Springer Nature journal article supplement (doi:10.1038/s41559-025-02667-x), 2025-04-08
Supplement: MOESM1 [file 41559_2025_2667_MOESM1_ESM.pdf]

---

# Restoration cannot be scaled up globally to save reefs from loss and degradation

---

In the format provided by the  
authors and unedited

## Supplementary Information

### **Restoration cannot be scaled up globally to save reefs from loss and degradation**

Clelia Mula<sup>1</sup>, Corey J. A. Bradshaw<sup>2,3,4</sup>, Mar Cabeza<sup>1</sup>, Federica Manca<sup>1</sup>, Simone Montano<sup>5,6</sup>, Giovanni Strona<sup>7\*</sup>

\*giovanni.strona@ec.europa.eu

<sup>1</sup>Faculty of Biological and Environmental Sciences, Organismal and Evolutionary Biology Research Programme, University of Helsinki, PO Box 65 Viikinkaari 1, Helsinki, 00014 Finland <sup>2</sup>Global Ecology | *Partuyarta Ngadluku Wardli Kuu*, College of Science and Engineering, Flinders University, GPO Box 2100, Adelaide, South Australia 5001, Australia

<sup>2</sup>Australian Research Council Centre of Excellence for Australian Biodiversity and Heritage, Wollongong, New South Wales, Australia

<sup>3</sup>Australian Research Council Centre of Excellence for Indigenous and Environmental Histories and Futures, Cairns, Queensland, Australia

<sup>4</sup>Global Ecology | *Partuyarta Ngadluku Wardli Kuu*, College of Science and Engineering, Flinders University, GPO Box 2100, Adelaide, South Australia 5001, Australia

<sup>5</sup>Department of Earth and Environmental Sciences (DISAT), University of Milano-Bicocca, Piazza Della Scienza 1, 20126, Milan, Italy

<sup>6</sup>MaRHE Centre (Marine Research and High Education Center), Magoodhoo Island, Faafu Atoll, 12030, Republic of Maldives

<sup>7</sup>European Commission, Joint Research Centre (JRC), Ispra, Italy

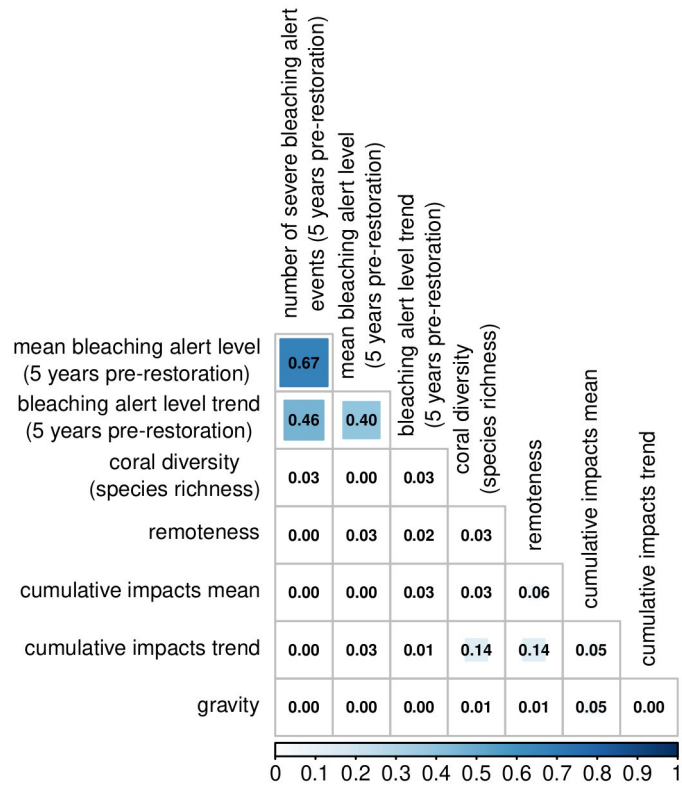

**Figure S1 | Pairwise correlation (Pearson’s R<sup>2</sup>) between the independent variables used to predict the choice of restoration sites. Total n observations = 3324.**

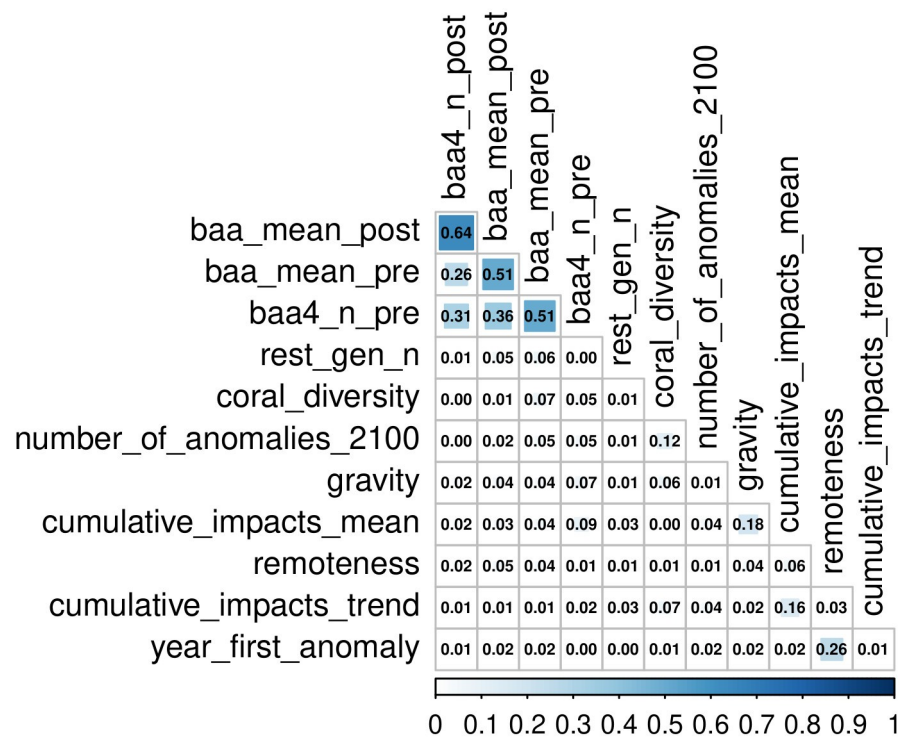

**Figure S2 | Pairwise correlation (Pearson's R2) between the independent variables used to predict coral restoration success.** Total n observations = 134.
